# Supplementary material
Source: publisher figshare collection journal article supplement (https://springernature.figshare.com/ndownloader/files/7172498)
Supplement: Supplementary file 1 [file 7172498]

## Sheet: Ark1
	Measured for growth	Never measured for growth	P-value for difference between groups
Number	2.043	277
Male (n (%))	879 (43%)	111 (40%)	p=0.35
Twin or triplet (n (%))	437 (21%)	58 (21%)	p=0.66
Rainy season (n (%))	886 (43%)	110 (40%)	p=0.25
Electricity in household (n (%))	658 (32%)	78 (29%)	p=0.20
No oral polio vaccine at enrolment (n (%))	84 (4%)	15 (5%)	p=0.31
Allocated to VAS (n (%))	759 (37%)	95 (34%)	p=0.21
Median age at enrolment (days (10th; 90th percentile))	2 (1-10)	2 (1-9)	p=0.67
Weight /kg (Median, 10th; 90th percentile)	2.2 (1.6; 2.4)	2.1 (1.4; 2.4)	p<0.01
Length /mm (Mean, SD)	45 (2.2)	44 (2.6)	p<0.01
Head circumference /cm (Mean, SD)	31 (1.9)	30 (2.2)	p<0.01
MUAC* /cm (Mean, SD)	7.8 (0.9)	7.6 (0.9)	p<0.01
Maternal MUAC* /cm (Mean, SD)	24 (2.8)	23 (2.7)	p<0.01
*MUAC (Mid upper arm circumference)
